# Supplementary material for: C-Terminal properties are important for ring-fused 2-pyridones that interfere with the chaperone function in uropathogenic E. coli
Source: Royal Society of Chemistry journal article supplement (doi:10.1039/b509376g), 2005-01-01

## Supporting information

C-terminal properties are important for ring-fused 2-pyridones that interfere with chaperone function in uropathogenic *E. coli*

*Veronica Åberg<sup>a</sup>, Mattias Hedenström<sup>a</sup>, Jerome S. Pinkner<sup>b</sup>, S. J. Hultgren<sup>b</sup> and Fredrik Almqvist<sup>a\*</sup>*

<sup>a</sup>Organic Chemistry, Department of Chemistry, Umeå University, SE-90187 Umeå, Sweden

<sup>b</sup>Molecular Microbiology, Washington University in St. Louis School of Medicine, St. Louis, MO 63110, USA

[fredrik.almqvist@chem.umu.se](mailto:fredrik.almqvist@chem.umu.se)

### Contents

(Page 2-Page 9): <sup>13</sup>C NMR spectra of compounds **3-10**

(Page 10-Page 12): Chiral HPLC chromatograms and conditions for compounds (+)-**1**, (-)-**3** and (-)-**5**

### Compound (-)-3

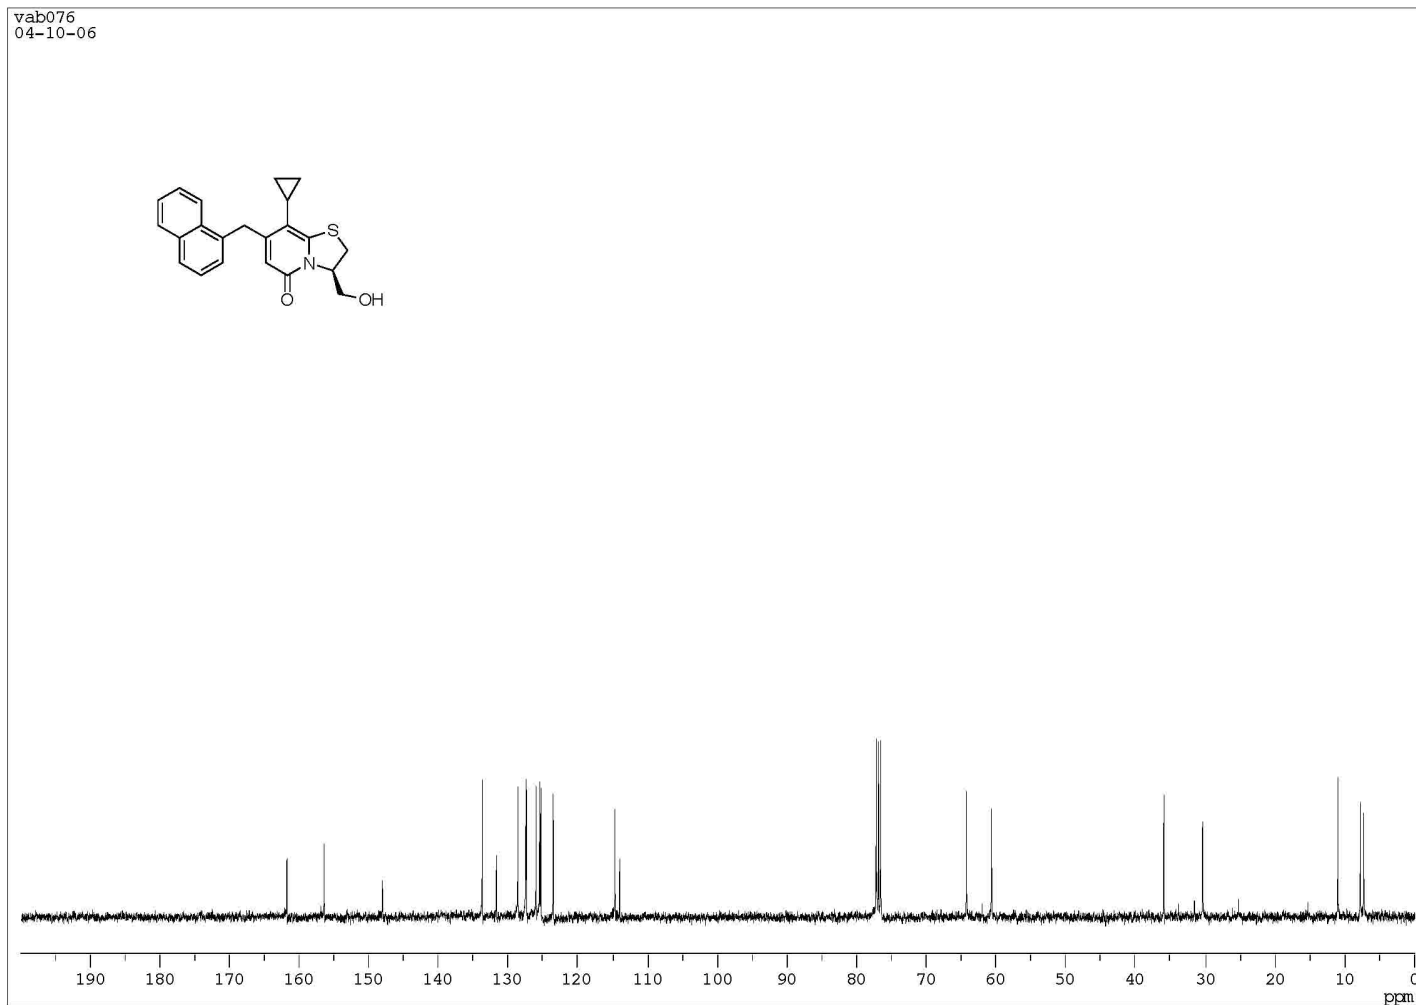

Compound (-)-4

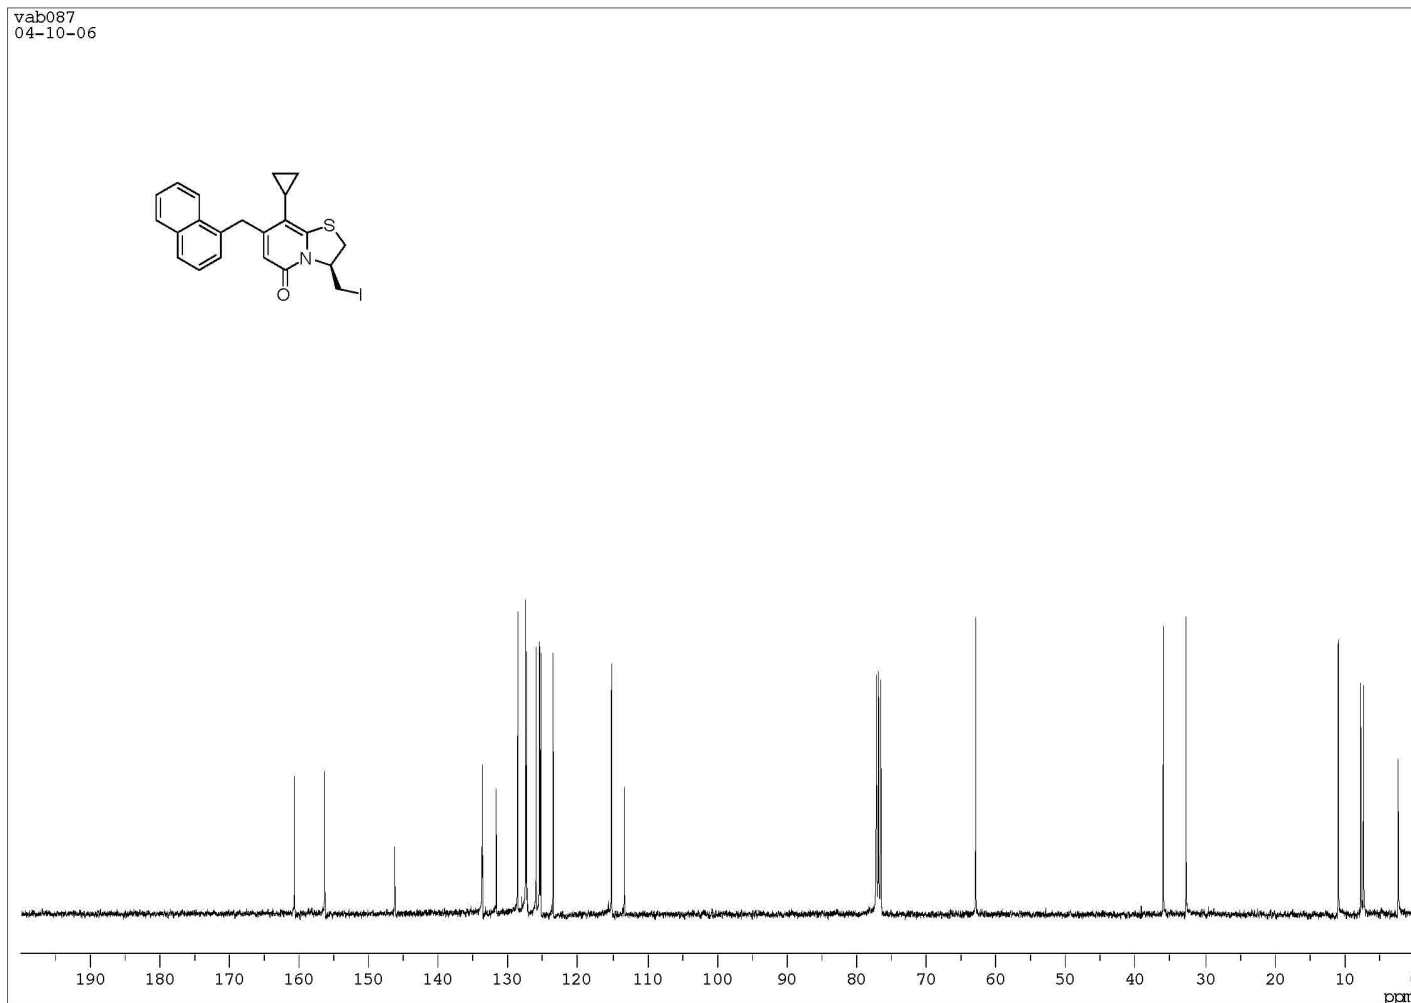

Compound (-)-5

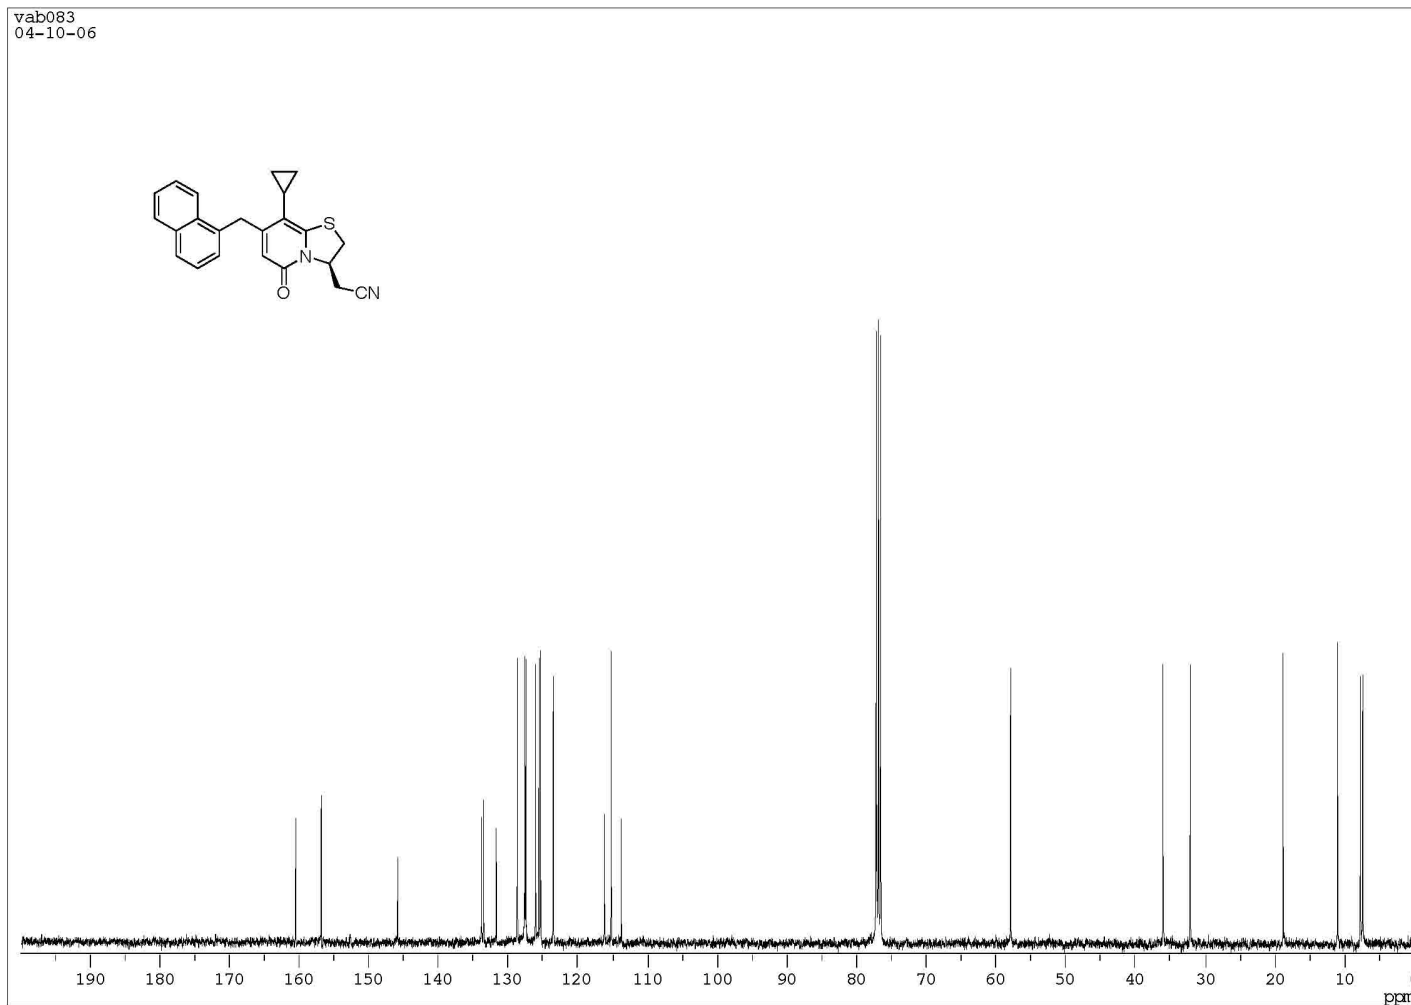

Compound (-)-6

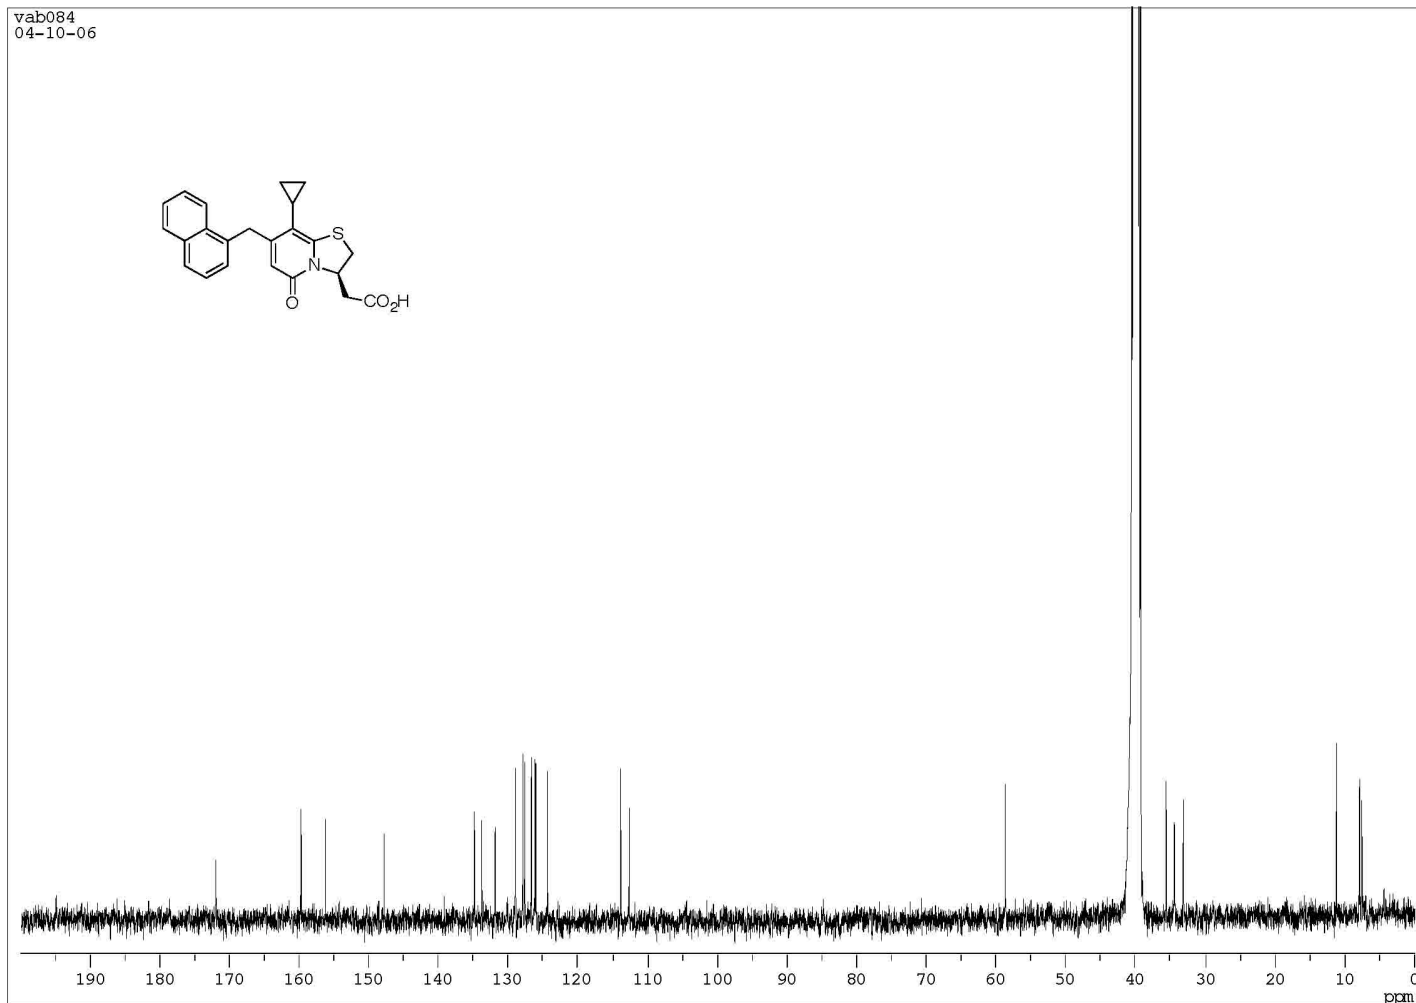

Compound (-)-7

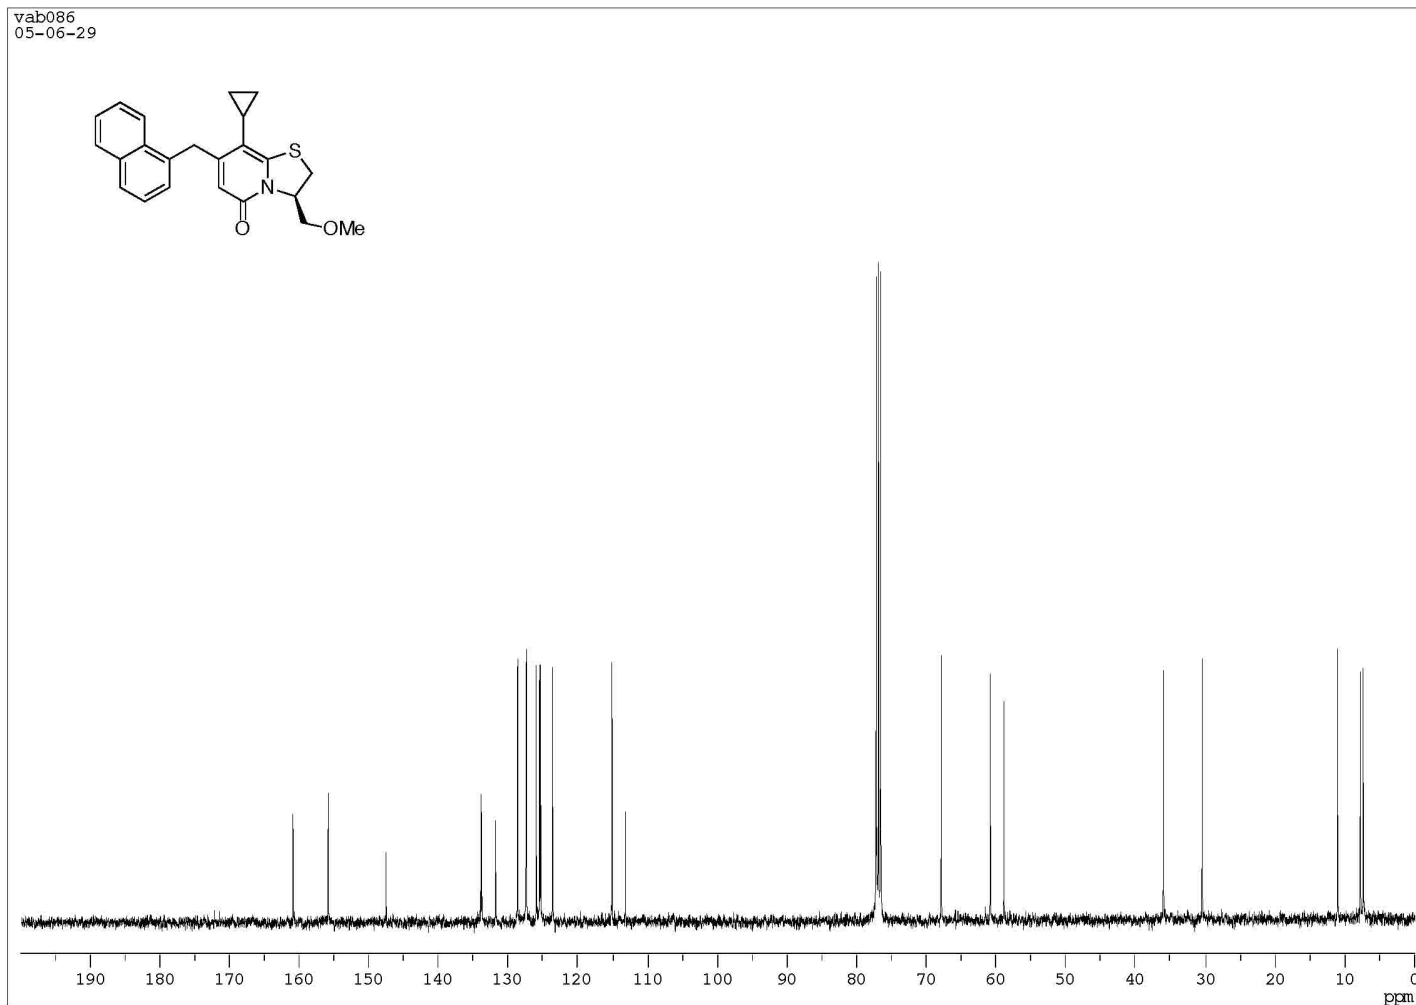

Compound (-)-8

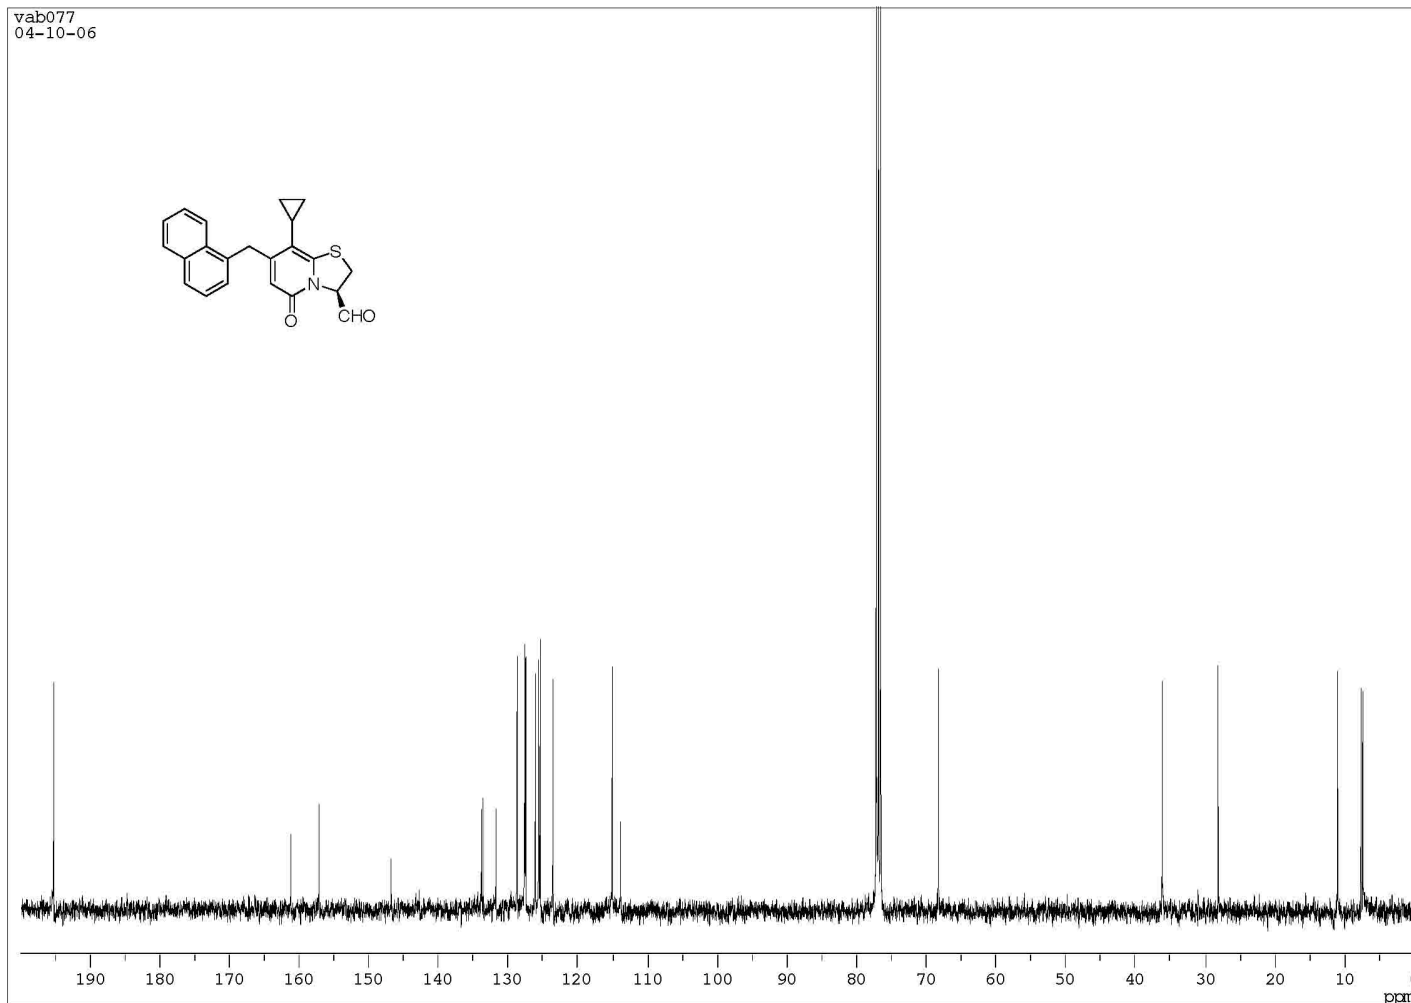

Compound (-)-**9**

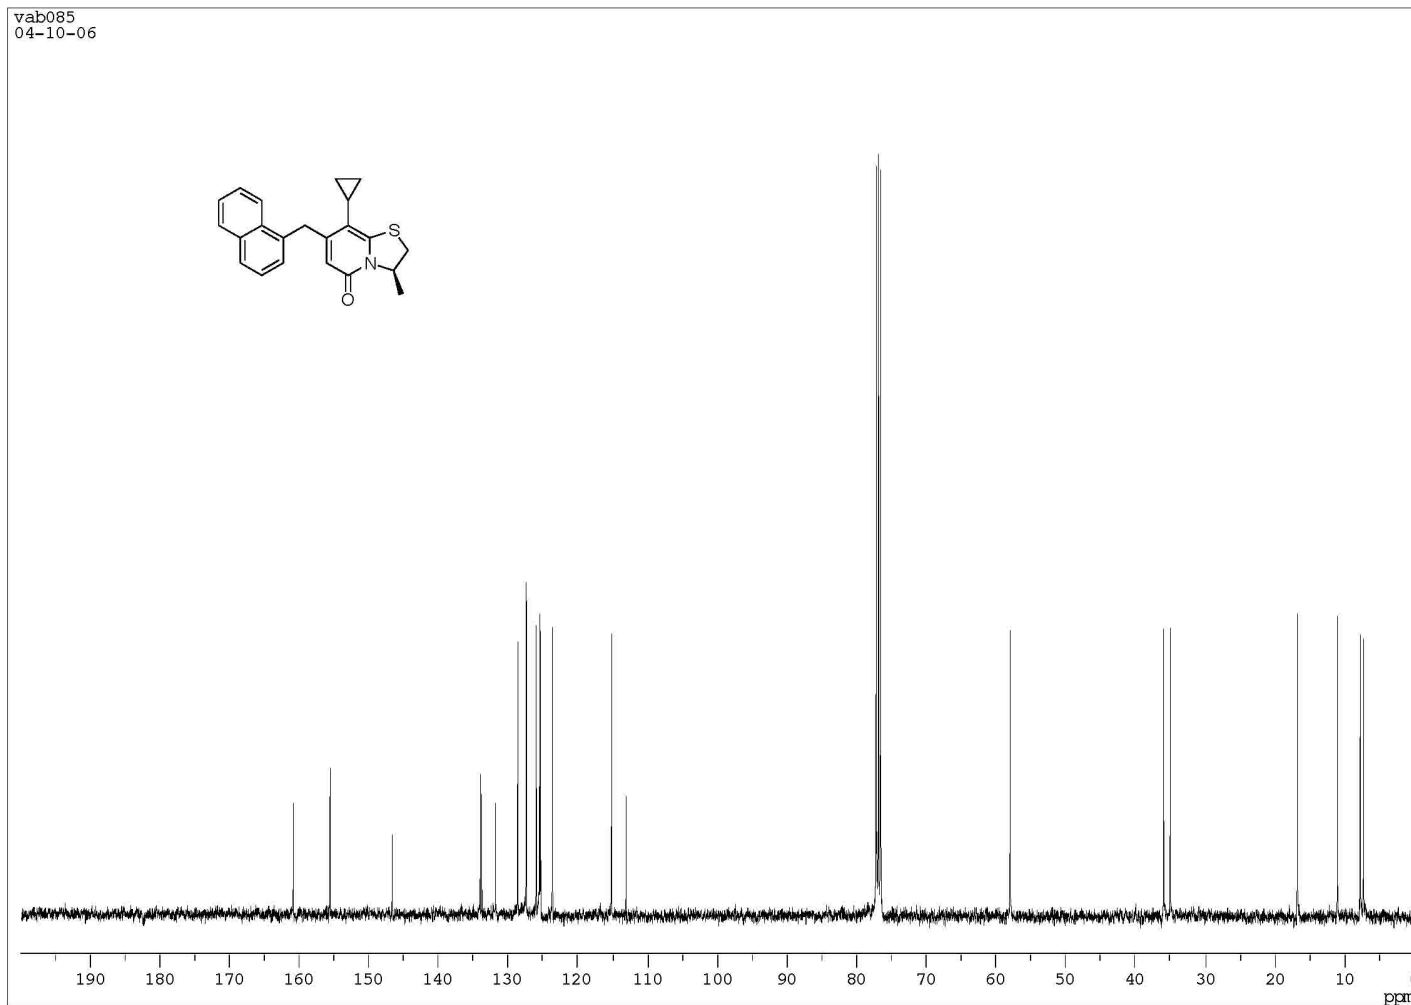



Compound (-)-10

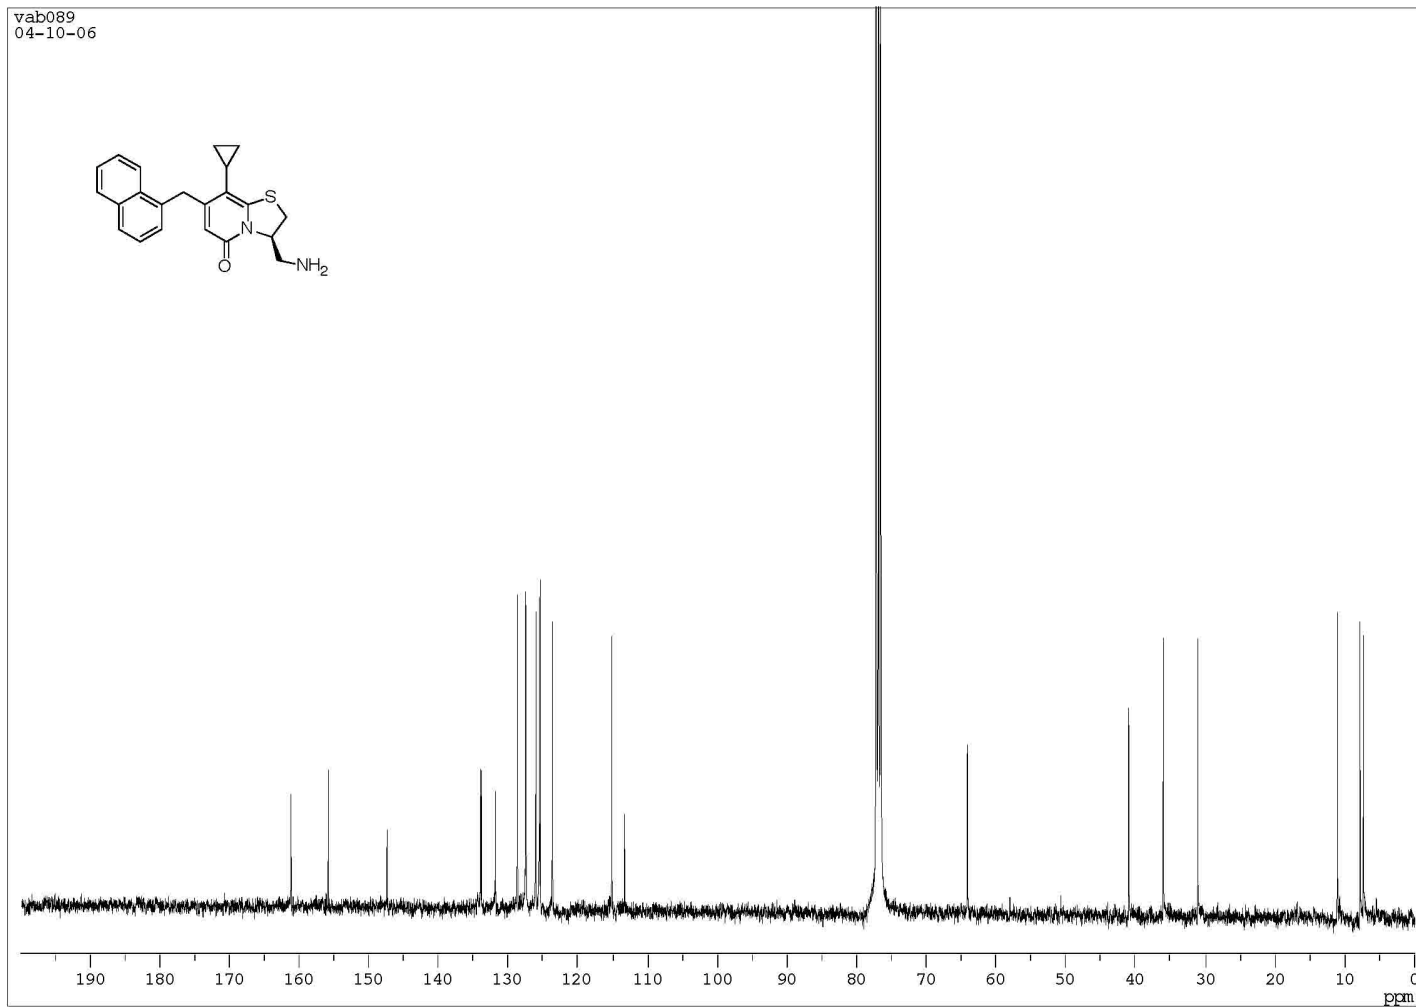

Column: (S,S)-Whelk-O1  
Mobile phase: CH<sub>2</sub>Cl<sub>2</sub>:Hexane:2-propanol (12:12:1)  
Flowrate: 1 ml/min

Analysed compound: (+)-1

NAME: CHAN LEV REP TYPE: DIRECTORY  
COLLECTION DATA: 10145554 A 1 1 011g C:\GOLD\SYSTEM\DATA\SUSSE\1  
METHOD: CHIRAL  
REPORT DATA: 10145554 A 1 1 011g C:\GOLD\SYSTEM\DATA\SUSSE\1  
METHOD: KIEHLER

TIME: INJECTION: 14:55:54 10 JAN 2005  
ANALYSIS: 16:04:13 10 JAN 2005  
REPORT: 14:19:22 31 JAN 2005

SAMPLE TABLE  
SYSTEM 1: SYSTEM1  
Chart Speed: 0.50 cm/min

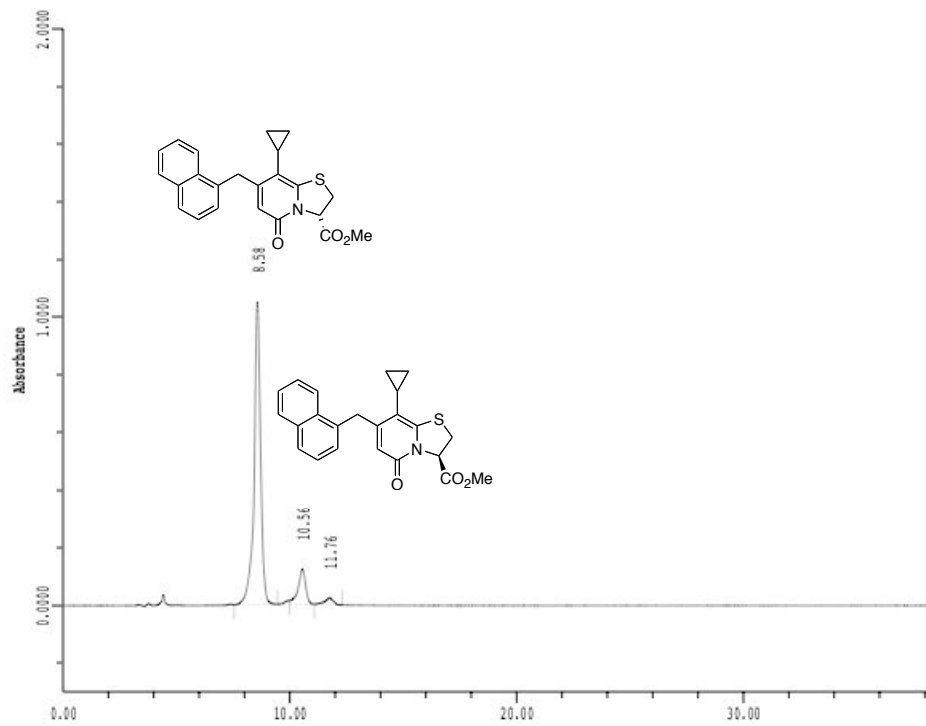

Column: (S,S)-Whelk-O1  
Mobile phase: Hexane:2-propanol (7:3)  
Flowrate: 1 ml/min

Analysed compound: (-)-3

NAME: CEAN LEV REP TYPE: DIRECTORY  
COLLECTION DATE: 171116932 A 1 1 0619 C:\GOLD\SYS1027A\  
METHOD FILE: C:\GOLD\SYS1027A\  
TIME: DATE  
INJECTION: 11:59:32 17 MAR 2005  
ANALYSIS: 12:56:55 17 MAR 2005  
REPORT: 15:28:11 1 JAN 1990

SAMPLE TABLE: none  
SYSTEM: 1, SYSTEM1

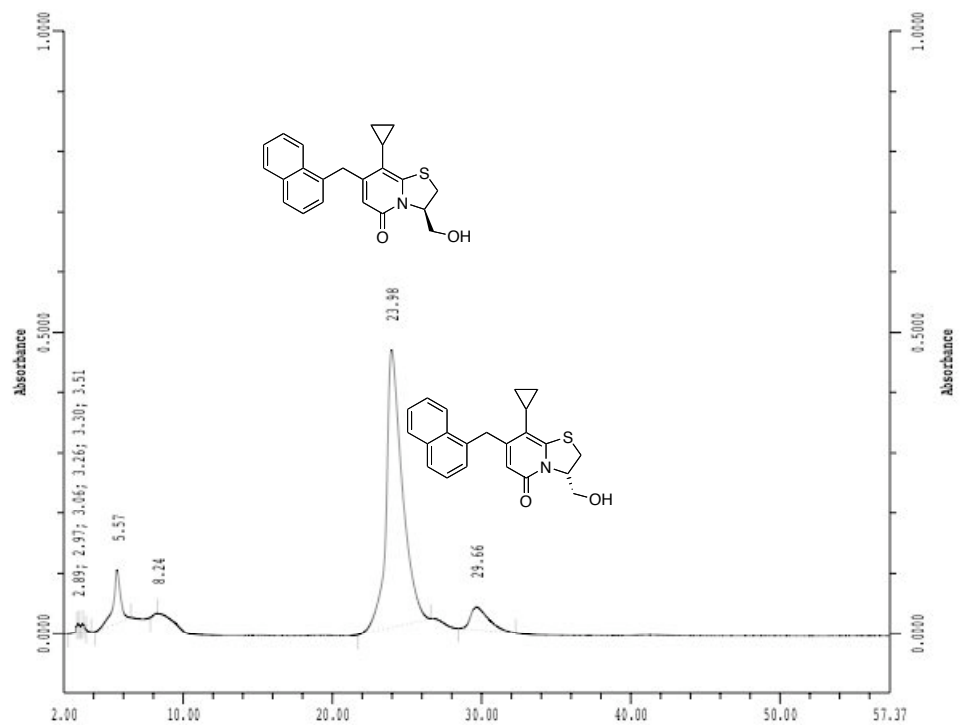

Column: (S,S)-Whelk-O1  
 Mobile phase: CH<sub>2</sub>Cl<sub>2</sub>:Hexane:2-propanol (12:12:1)  
 Flowrate: 1 ml/min

Analysed compound: (-)-5

NAME: CHAN LEV REP TYPE: DIRECTORY  
 COLLECTION DATA: 02151554 A 1 1 0119 C:\GOLD\SYSTEMA\  
 METHOD: HPLC C:\GOLD\SYSTEMA\  
 TIME: 15:15:54 2 JAN 1990  
 ANALYSIS: 16:15:55 2 JAN 1990  
 REPORT: 17:40:11 2 JAN 1990

SAMPLE TABLE  
 SYSTEM 1: SYSTEM1

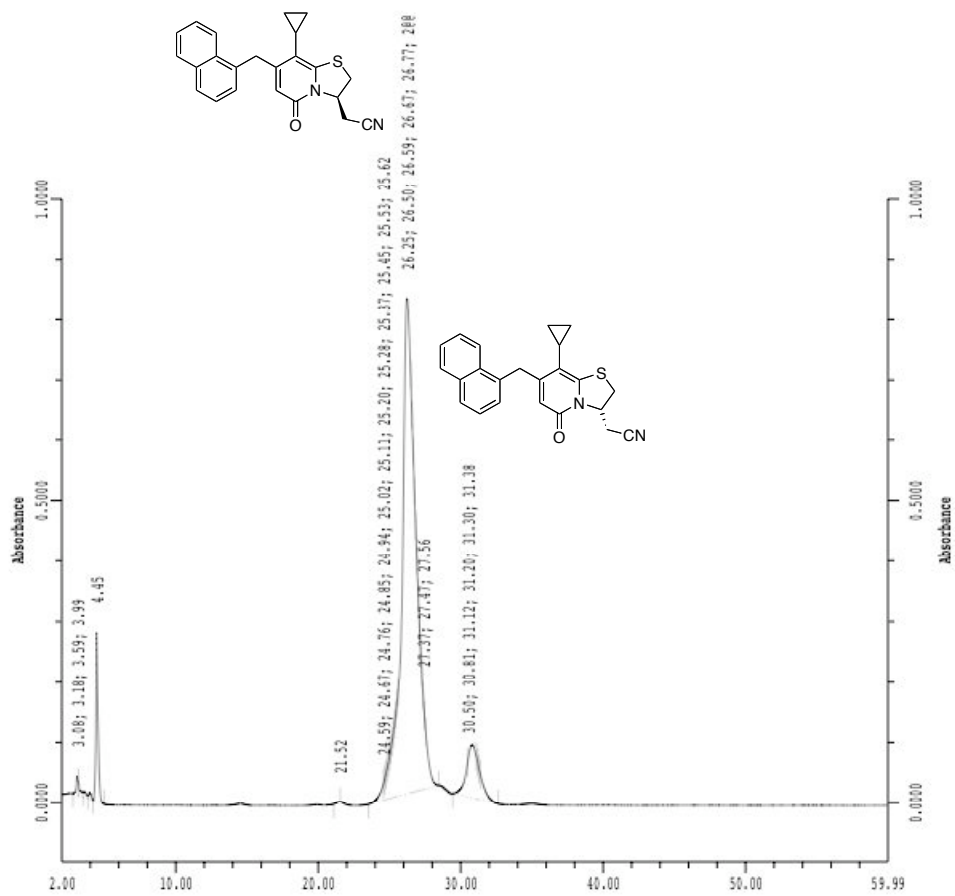

Supplement: b509376g.pdf [file b509376g.pdf]
